# Supplementary material for: The Effect of Water Level in Rice Cropping System on Phosphorus Uptake Activity of Pup1 in a Pup1+Sub1 Breeding Line
Source: MDPI journal article supplement (doi:10.3390/plants10081523), 2021-07-26
Supplement: s1 [file s1]

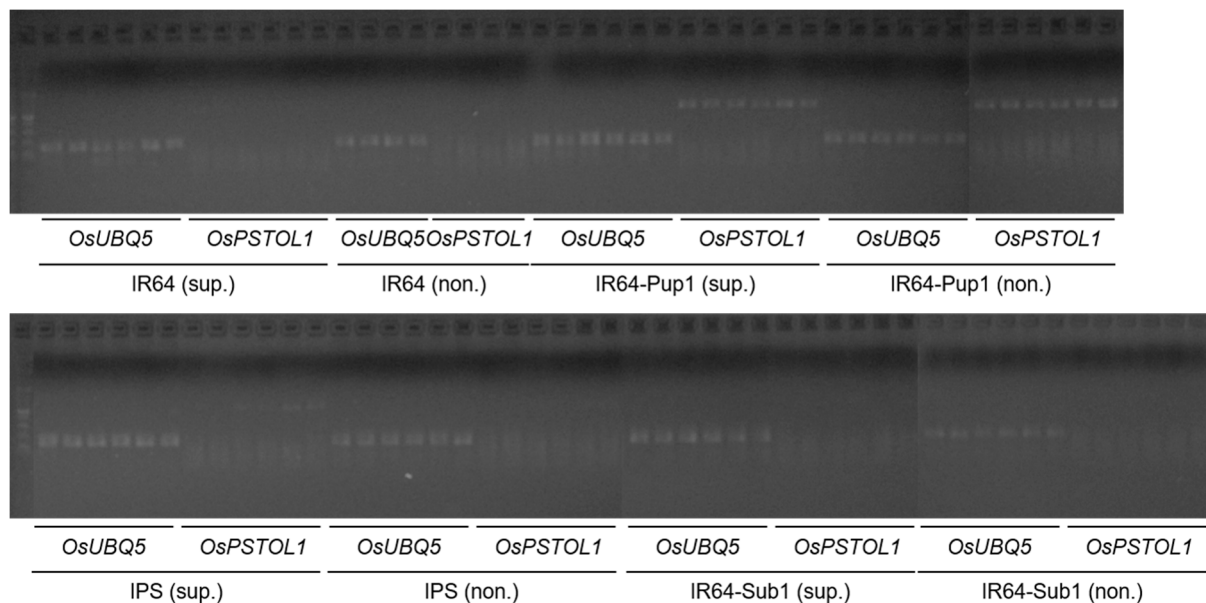

**Figure S2.** The confirmation of quantitative PCR amplicons of *OsPSTOL1* in IR64, IR64-Pup1, IPS, and IR64-Sub1 in P supplied and non-supplied condition. *OsUBQ5* was used as an internal control of rice to normalize gene expression in real-time RT-PCR experiments.
