# Supplementary material for: The Effect of Water Level in Rice Cropping System on Phosphorus Uptake Activity of Pup1 in a Pup1+Sub1 Breeding Line
Source: MDPI journal article supplement (doi:10.3390/plants10081523), 2021-07-26
Supplement: s1 [file s1]

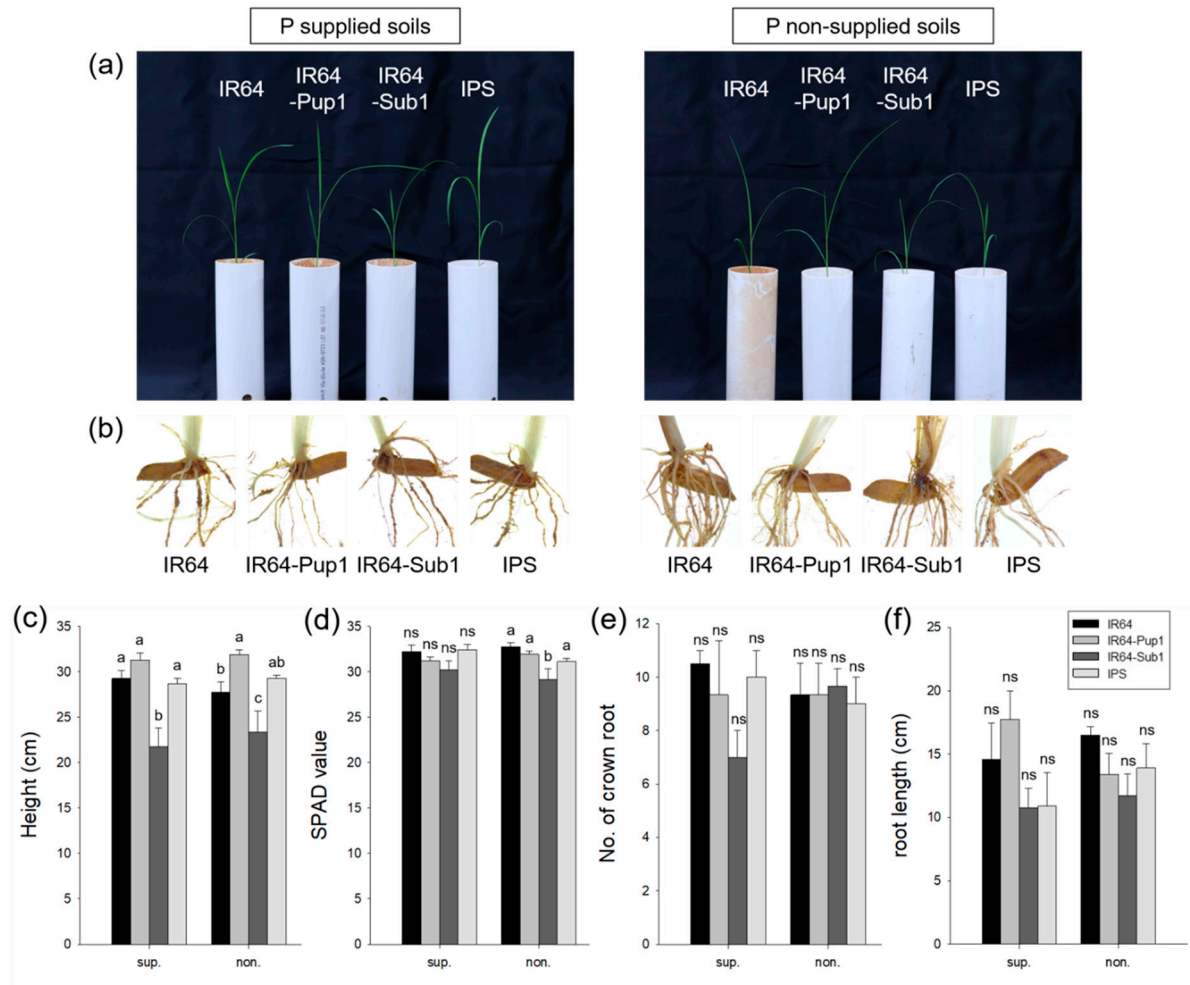

**Figure S1.** Phenotypic analysis of IR64, IR64-Pup1, IR64-Sub1, and IPS under different phosphorous conditions at 14 days after transplanting (DAT). **(a,b)** Phenotype of plants that were grown under P supplied and P non-supplied conditions, respectively. **(c,d)** Plant height and SPAD value. **(e)** Tiller numbers per plant under P-supplied condition. **(f,g)** Crown root number per plant, root length. The letters above bars represent statistical significance ( $p < 0.01$ ) as measured by Duncan's multiple range test.
