# Supplementary material for: The Effect of Water Level in Rice Cropping System on Phosphorus Uptake Activity of Pup1 in a Pup1+Sub1 Breeding Line
Source: Plants (Basel). 2021 Jul 26;10(8):1523. doi: 10.3390/plants10081523 (PMC8402110; doi:10.3390/plants10081523)
Supplement: Supplementary file 1 [file plants-10-01523-s001.zip]

Archive with 4 entries (4 files):
- Figure S1.pdf
- Figure S2_20210722.pdf
- Table S1.xlsx
- Table S2.xlsx
