# Supplementary material for: The Effect of Water Level in Rice Cropping System on Phosphorus Uptake Activity of Pup1 in a Pup1+Sub1 Breeding Line
Source: Plants (Basel). 2021 Jul 26;10(8):1523. doi: 10.3390/plants10081523 (PMC8402110; doi:10.3390/plants10081523)
Supplement: Supplementary file 1 [file plants-10-01523-s001.zip › Table S1.xlsx]

## Sheet: Table S1
	Table S1: List of primers used in this study
	No.	Primer Name	Target QTL (gene)	Forward (5'→3')	Reverse (5'→3')	Tolerance	Intolereance	purpose
	1	K46-1	Pup1 (K46-1)	TGAGATAGCCGTCAAGATGCT	AAGGACCACCATTCCATAGC	538	none	foreground genotyping
	2	K29-1	Pup1 (K29-1)	ATGGCCAACGGGGTAGAG	GTCCAGGTAACCACGAGGAA	228	215	foreground genotyping
	3	K20-2	Pup1 (K20-2) with BSP1286I	TCAAAAATTTCTTCAGGTATGTACTCC	TTGGGTGATCAGCTTTCAGA	240+355+419	419+598	foreground genotyping
	4	GnS2	Sub1 (Sub1A) with PvuII	CTTCTTGCTCAACGACAACG	TCGATGGGGTCTTGATCTCT	250	139+113	foreground genotyping
	5	OsUBQ5	OsUBQ5	AGTTCTACAAGGTGGACGAC	ACGCCTAAGCCTGCTGGTT	162	162	qRT-PCR
	6	OsPSTOL1	OsPSTOL1	CCCTGAGCTGGGATAGACTG	TGAGCCAGTAGAATGTTTTGAGG	127	-	qRT-PCR
	7	Sub1A_qRT	Sub1A	CTCGGACGACGTGATGGACAG	AGGTGAAAATGATGCAGG	152	-	qRT-PCR
	8	adh1	adh1	CCAGTTCAGCAGGTACTTGC	CAGGATACACAGAAGAACCG	484	484	qRT-PCR
	9	OsPupK46-2(1)	OsPSTOL1	TGAGATAGCCGTCAAGATGCT	AAGGACCACCATTCCATAGC	532	-	RT-PCR
